# Supplementary material for: Effect of humic acid on the sulfamethazine adsorption by functionalized multi-walled carbon nanotubes in aqueous solution: mechanistic study
Source: Royal Society of Chemistry journal article supplement (doi:10.1039/c5ra26913j), 2016-01-01
Supplement: c5ra26913j1.pdf [file c5ra26913j1.pdf]

## Supporting Information

Effect of humic acid on the sulfamethazine adsorption by functionalized multi-walled carbon nanotubes in aqueous solution: mechanisms study

Quanquan Yang <sup>a</sup>, Xiaogang Li <sup>a</sup>, Guangcai Chen <sup>a\*</sup>, Jianfeng Zhang <sup>a</sup>, Baoshan Xing

<sup>b</sup>

<sup>a</sup> Research Institute of Subtropical Forestry, Chinese Academy of Forestry, Fuyang, Zhejiang 311400, China

<sup>b</sup> Stockbridge School of Agriculture, University of Massachusetts, Amherst, MA 01003, United States

\* Corresponding author.

Phone: 86-571-63105079

Fax: 86-571-63141304

E-mail addresses: [guangcaichen@sohu.com](mailto:guangcaichen@sohu.com) (Chen GC).

There are 9 figures and 3 tables.

There are 14 pages totlly.

**Figure and tables**

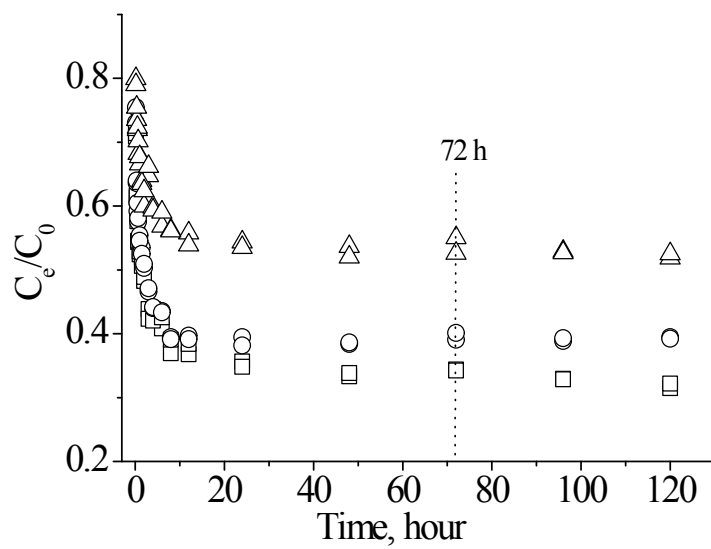

**Fig. S1.** Adsorption kinetics of HA onto P-MWCNT ( $\square$ ), C-MWCNT ( $\circ$ ), and H-MWCNT ( $\Delta$ ).

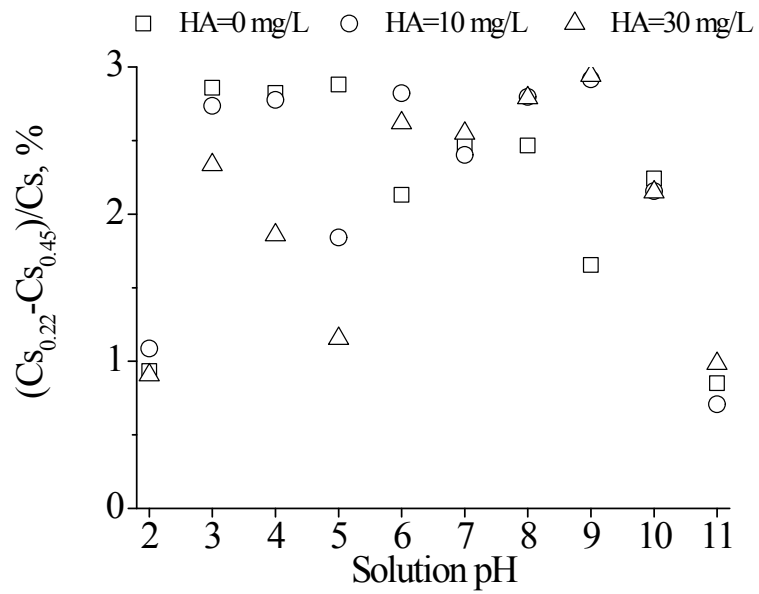

**Fig. S2** The effect of membrane pore size on measurement of solubility of SMZ.  $C_{s0.22}$  and  $C_{s0.45}$  are the solubility of SMZ filtered by 0.22  $\mu\text{m}$  and 0.45 $\mu\text{m}$ , respectively.

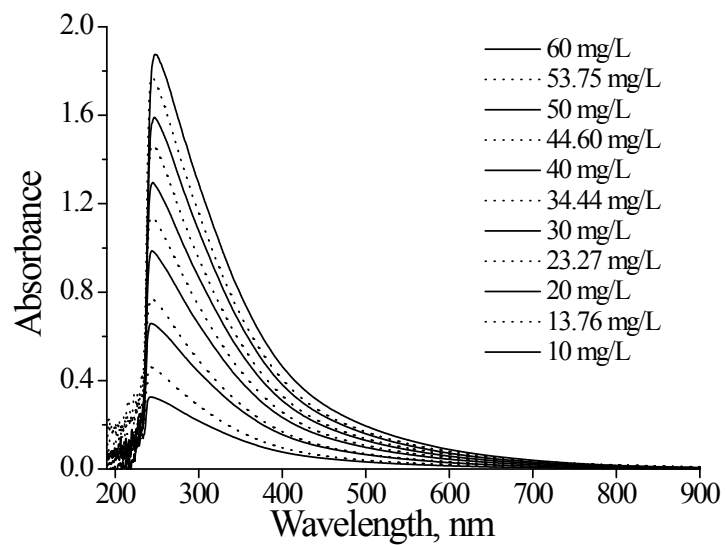

**Fig. S3.** Ultraviolet-visible absorbance spectra of HA with concentrations from 10 to 60 mg L<sup>-1</sup> at 190–900 nm. The solid line represents the HA concentration before adsorption and the dotted line shows the HA concentration at adsorption equilibrium.

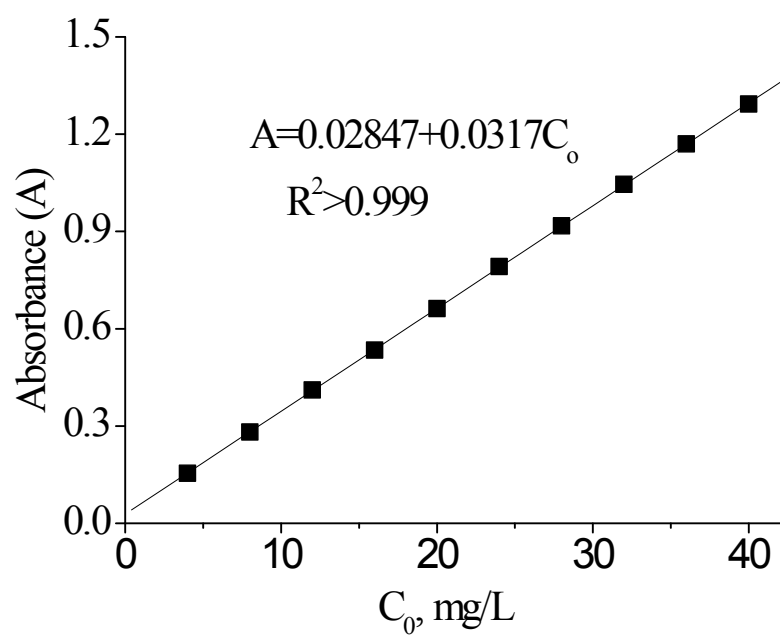

**Fig. S4.** HA concentration-absorbance calibration curve.

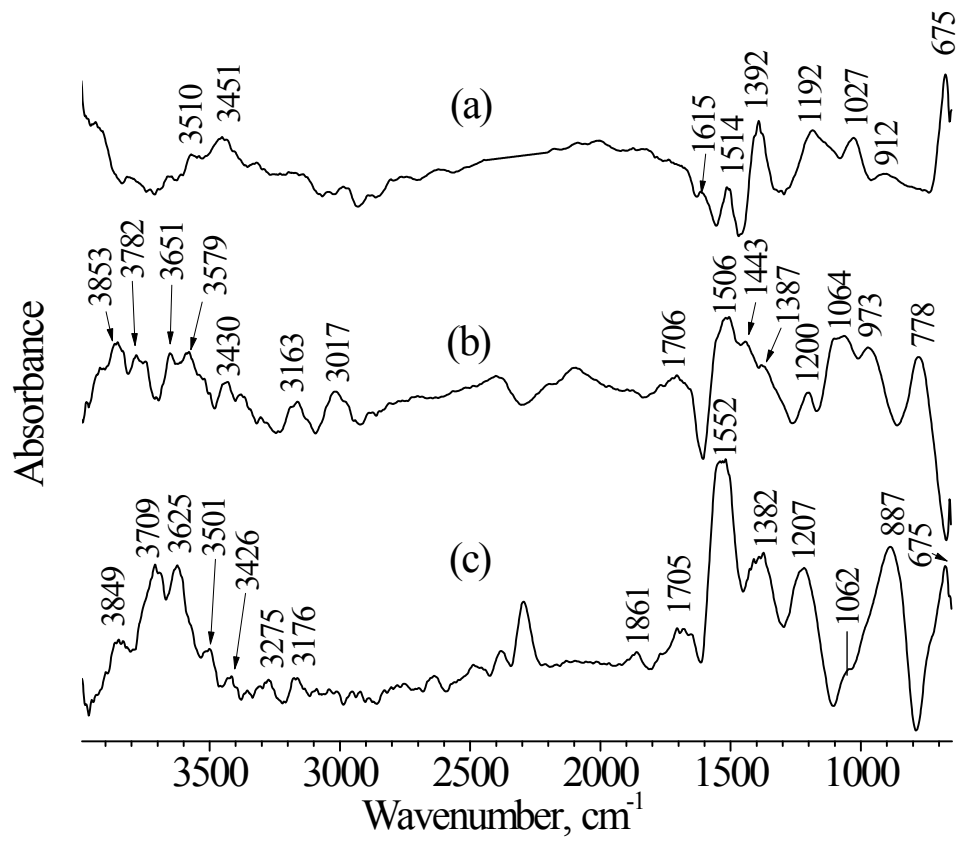

**Fig. S5.**  $\mu$ -FTIR spectra of P-MWCNT (a), C-MWCNT (b), and H-MWCNT (c).

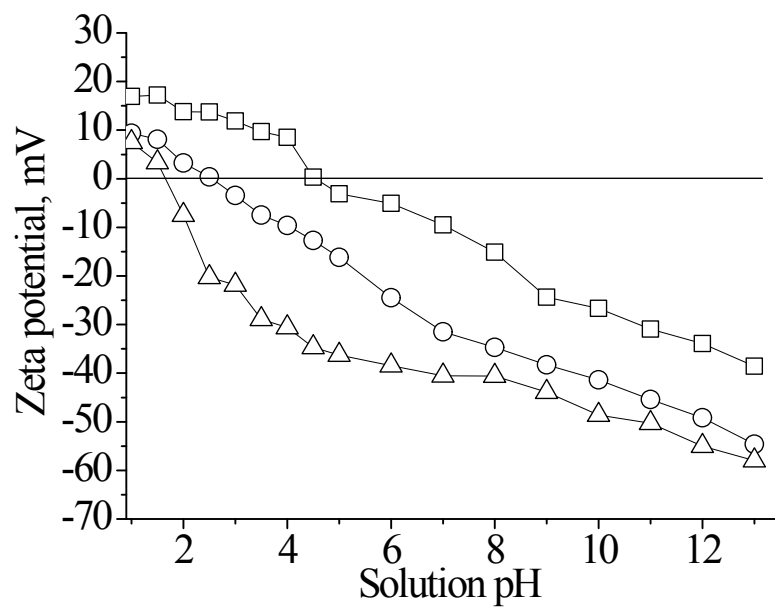

**Fig. S6.** Zeta potential of P-MWCNT ( $\square$ ), C-MWCNT ( $\circ$ ), and H-MWCNT ( $\Delta$ ) as a function of pH.

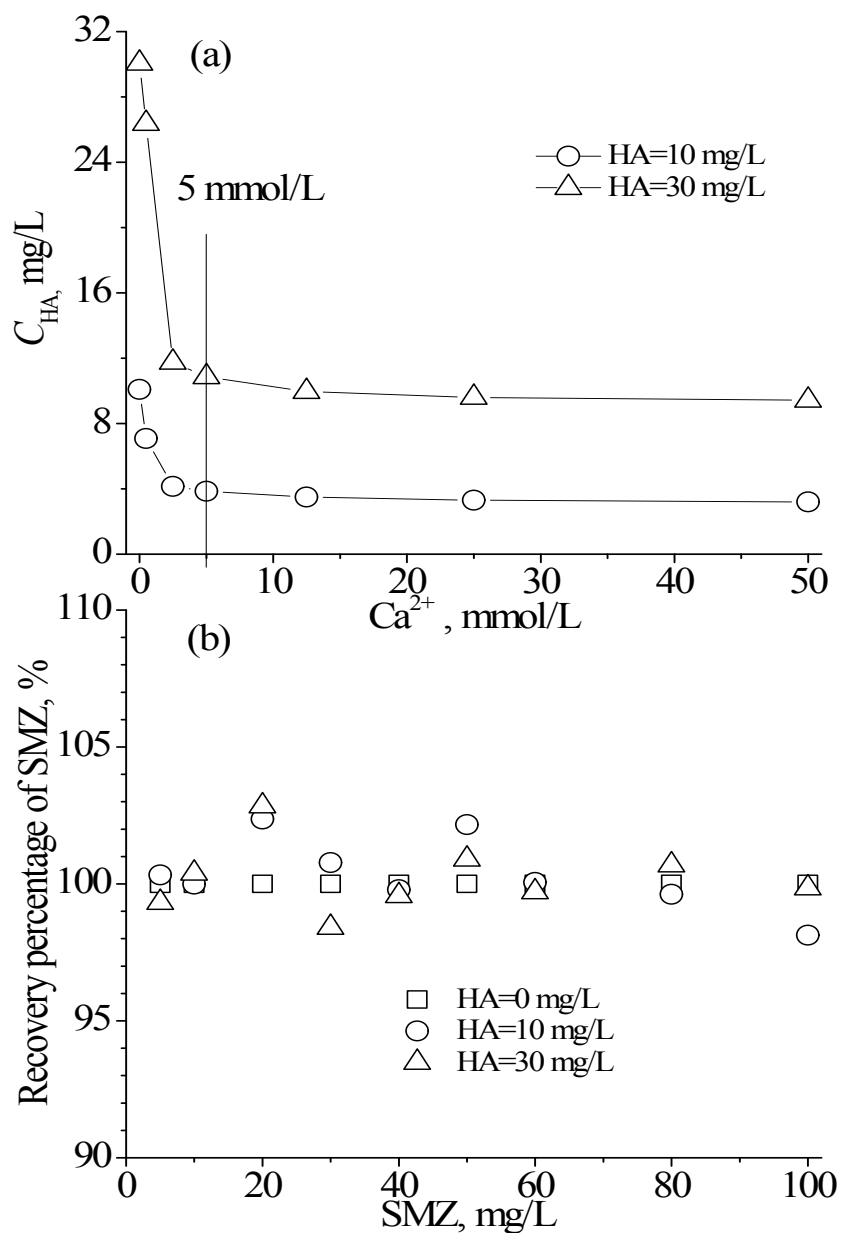

**Fig. S7.** Effect of HA on SMZ adsorption. (a) Concentration of HA as affected by  $Ca^{2+}$  (0–100 mM). The initial concentrations of HA were 10 and 30 mg/L.  $C_{HA}$  is the concentration of HA at which HA precipitation was caused by  $Ca^{2+}$  and separated using a 0.45  $\mu\text{m}$  hydrophilic membrane filter. (b) Recovery percentage of SMZ. The HA was precipitated by  $Ca^{2+}$  and was separated immediately using a 0.45  $\mu\text{m}$  hydrophilic membrane filter.



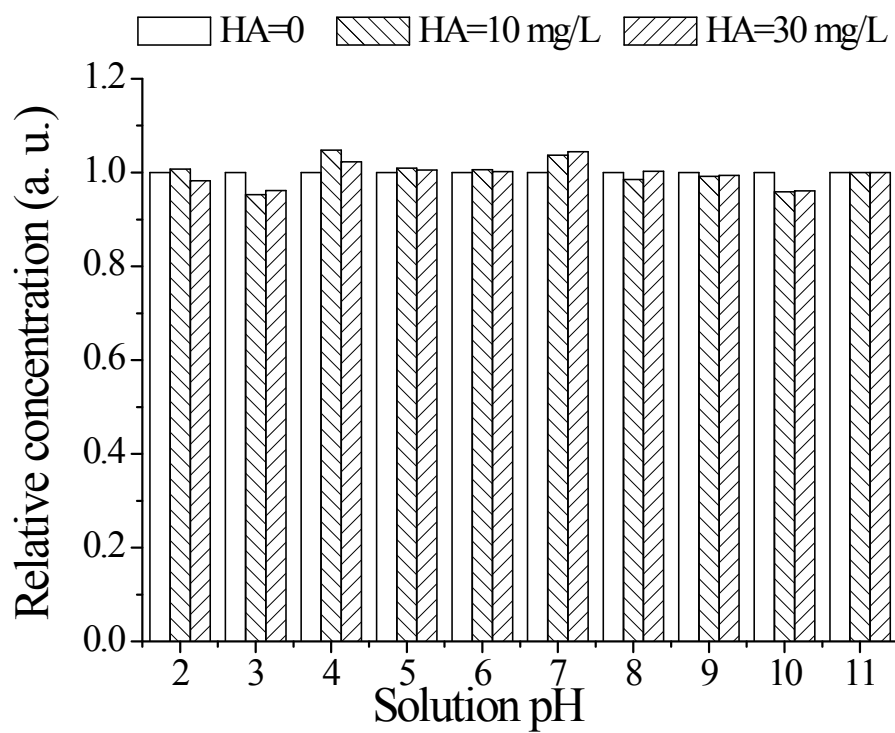

**Fig. S8.** Relative solubility based on a background solution (value = 1) of SMZ in the presence of HA.

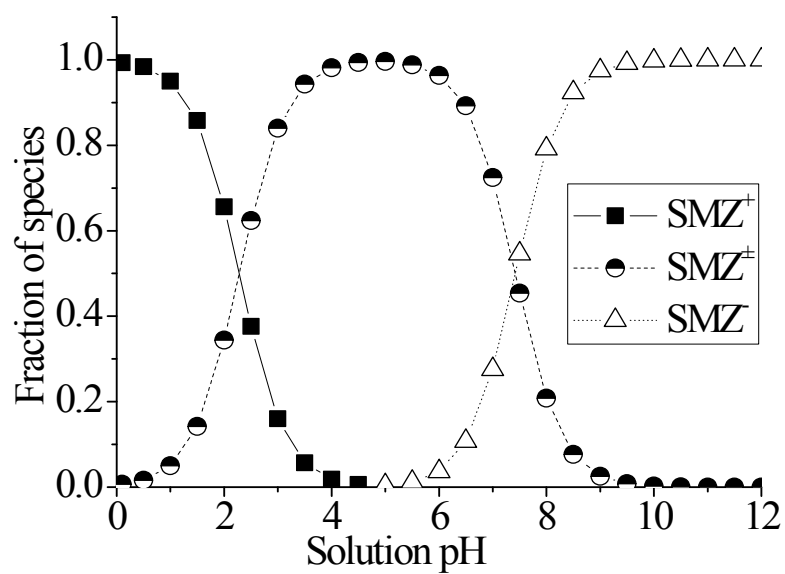

**Fig. S9.** The species distribution for SMZ at different solution pH.

**Table S1** Basic MWCNTs structural properties <sup>a</sup>.

| Name     | Outer diameter <sup>b</sup><br>(nm) | Inner diameter <sup>b</sup><br>(nm) | Carbon content <sup>c</sup><br>(%) | Oxygen content <sup>c</sup><br>(%) | Surface area <sup>d</sup><br>(m <sup>2</sup> ·g <sup>-1</sup> ) | Mesopore volume <sup>d</sup><br>(cm <sup>3</sup> ·g <sup>-1</sup> ) | Micropore volume <sup>d</sup><br>(cm <sup>3</sup> ·g <sup>-1</sup> ) |
|----------|-------------------------------------|-------------------------------------|------------------------------------|------------------------------------|-----------------------------------------------------------------|---------------------------------------------------------------------|----------------------------------------------------------------------|
| P-MWCNTs | 10-20                               | 5-10                                | 99                                 | 0.85                               | 167                                                             | 0.619                                                               | 0.016                                                                |
| C-MWCNTs | 10-20                               | 5-10                                | 97                                 | 2.16                               | 178                                                             | 0.629                                                               | 0.015                                                                |
| H-MWCNTs | 10-20                               | 5-10                                | 92                                 | 7.07                               | 185                                                             | 0.756                                                               | 0.024                                                                |

<sup>a</sup> The data are herein presented in Table. S1 were firstly published in Chen et al., 2009 <sup>1</sup>.

<sup>b</sup> The diameters were determined by transmission electron microscope (TEM);

<sup>c</sup> The carbon and oxygen contents were determined by X-ray photoelectron spectroscopy (XPS);

<sup>d</sup> The surface area and pore volume were determined by nitrogen gas adsorption and desorption at 77k with ASAP2000 (Micromeritics Instrument Corporation).

**Table S2** Elemental compositions and <sup>13</sup>C NMR estimates of carbon distributions for HA.

| sample | Elemental composition (%) <sup>a</sup> |      |       |      | Ash(%) <sup>a</sup> | (O+N)/C <sup>b</sup> | Integration of NMR results (%) |            |                           |
|--------|----------------------------------------|------|-------|------|---------------------|----------------------|--------------------------------|------------|---------------------------|
|        | C                                      | H    | O     | N    |                     |                      | Aliphatic C                    | Aromatic C | Aliphaticity <sup>c</sup> |
| AHA    | 57.07                                  | 3.25 | 36.85 | 1.47 | 1.36                | 0.50                 | 22.3                           | 53.7       | 0.42                      |

<sup>a</sup> Mass-based percentages. The C, H and N were determined by CHN Elemental Analyzer (EA 1112, Thermo Finnigan, Italia), the ash were determined using combustion the processed ash at 750 °C for 4 hour, and the oxygen content were calculated by mass difference [Oxygen content = 100 % -(C content +H content +N content)].

<sup>b</sup> Molar-based ratios.

<sup>c</sup> Aliphaticity was calculated as aliphatic C (0-109 ppm)/aromatic C (109-163 ppm) ratio<sup>2</sup>. The major structural carbons were measured using a 300M Hz NMR spectrometer (Bruker AV300, Switzerland).

**Table S3** Structural and physicochemical properties of sulfamethazine.

| Compound       | CAS number <sup>a</sup> | Chemical structure <sup>a</sup>                                                   | Molecular weight (g·mol <sup>-1</sup> ) | Water solubility (g·L <sup>-1</sup> ) <sup>b</sup> | pKa <sup>c</sup> |
|----------------|-------------------------|-----------------------------------------------------------------------------------|-----------------------------------------|----------------------------------------------------|------------------|
| sulfamethazine | 57-68-1                 | 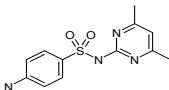 | 278.33                                  | Fig. 5(a)                                          | 2.28<br>7.42     |

<sup>a</sup> from chemBlink Database of Chemicals from Around the World

<http://www.chemblink.com/products/57-68-1.htm>

<sup>b</sup> The water solubility of SMZ were determined at temperature 298 K.

<sup>c</sup> Reference from <sup>3-5</sup>.

## **Literature cited**

1 G.C. Chen, X.Q. Shan, Y. Zhou, X. Shen, H. Huang, S. Khan, *J. Hazard. Mater.*, 2009, 169, 912.

2 D. Zhang, B. Pan, R.L. Cook, B. Xing, *Environ. Pollut.*, 2015, 196, 292.

3 C. Lin, C. Chang, W. Lin, *J. Chromatogr. A.* 1997, 768, 105.

4 Z. Qiang, C. Adams, *Water Res.*, 2004, 38, 2874.

5 X. Guo, C. Yang, Z. Dang, Q. Zhang, Y. Li, Q. Meng, *Chem. Eng. J.*, 2013, 223, 59.
